# Supplementary material
Source: PubMed Central journal article supplement (PMC3903117)
Supplement: NIHMS518568-supplement-Appendix_B_Oceania.pdf [file NIHMS518568-supplement-Appendix_B_Oceania.pdf]

## AUSTRALIA

The Australian estimate is based on Charles Price, *Australian Population: Ethnic Origins, People and Place*, vol. 7, no.4, page 12-16. About 2% of the population is estimated to be descended from the continent's aboriginal population. The large majority of the ancestors of today's Australians came from European countries, with the colonial power, the U.K., accounting for 62.9%, and Ireland (8.6%), Germany (3.6%), Italy (3.46%), Greece (1.8%), the Netherlands (1.4%) and Spain (1%) as the next-largest sources. An estimated 1.4% is descended from people from Lebanon. Recent years have seen an increase in immigration from Asia, especially China (2.3%), Vietnam (0.9%) and India (0.8%).

### Estimate

Armenia 0.1%  
Australia 2%  
Austria 0.2%  
Bosnia and Herzegovina 0.1%  
Cambodia 0.1%  
China 2.3%  
Croatia 0.8%  
Czech Republic 0.1%  
Denmark 0.4%  
Egypt, Arab Rep. 0.2%  
Finland 0.1%  
France 0.535%  
Germany 3.605%  
Greece 1.8%  
Hungary 0.4%  
India 0.8%  
Indonesia 0.3%  
Iraq 0.1%  
Ireland 8.6%  
Italy 3.456%  
Japan 0.2%  
Korea, Rep. 0.2%  
Latvia 0.1%  
Lebanon 1.4%  
Lithuania 0.00525%  
Macedonia 0.5%  
Malaysia 0.1%  
Malta 0.8%  
Netherlands 1.4%  
Norway 0.2%  
Philippines 0.8%  
Poland 0.9105%  
Portugal 0.2805%  
Romania 0.12275%  
Russia 0.40875%  
Serbia and Montenegro 0.3%  
Slovakia 0.1%  
Slovenia 0.1%  
Spain 1.022%

Sweden 0.3%  
Switzerland 0.2%  
Thailand 0.2%  
Turkey 0.3455%  
Ukraine 0.20875%  
UK 62.9%  
Vietnam 0.9%

## FIJI

Slightly over half of the population is descended from indigenous people usually classified as Melanesian or Polynesian. The ancestors of present-day Indian Fijians (45%) came as indentured servants in the late 19<sup>th</sup> to early 20<sup>th</sup> centuries (CQ). The term “Euronesian” is used to denote people of mixed European and Polynesian ancestry (1.85%) (EB). Half of these are assumed to have originated from the UK, since Fiji was a longtime British colony. There are also a group identified as “USA Whites” (0.5%) whose ancestors were attributed to the top ten European country populations of the U.S., according to their percentages in the U.S. The ancestors of the 0.8% of Fijians listed as Anglo-Australian are assumed to come from the UK. There is a small population of Chinese (0.7%).

Estimate:

China: 0.7%  
Fiji: 52.1%  
India: 45%  
UK: 1.8198% (0.1198% as ancestors from USA White, 0.8% as ancestors from Anglo-Australian)  
USA White: (Total 0.5%)  
    France: 0.0059%  
    Germany: 0.1411%  
    Ireland: 0.0996%  
    Italy: 0.0519%  
    Netherlands: 0.0148%  
    Norway: 0.0155%  
    Poland: 0.0295%  
    Russia: 0.0083%  
    Sweden: 0.0136%  
    UK: (0.1198%)

## NEW ZEALAND

Maori (9%) lived in New Zealand long before 1500 (CF, NE, CQ, EB, WCD). The Europeans began to settle in New Zealand in the 1820s, including 67% in total from the UK, 11.3% from Ireland, and 1.2% from Netherlands (EB, WCD,\*). The Irish population is attributed to the UK and Ireland in proportion to the ratio of current Irish populations in the UK and Ireland. There is also an Asian community (5.5%) including 3.5% Chinese, 1% Korean, and 2% Indians (CF, EB, NE, WCD). Some Pacific Islanders arrived in New Zealand more recently from Samoa (3%), the Cook Islands (1.4%), Niue (0.5%), and Tonga (1.1%).

### Estimate

China: 3.5%  
Cook Islands: 1.4%  
India: 2%  
Ireland: 11.3%  
Korea: 1%  
Netherlands: 1.2%  
New Zealand: 9%  
Niue: 0.5%  
Samoa: 3%  
Tonga: 1.1%  
UK: 67%

[\\*http://www.ethnicaffairs.govt.nz/oeawebsite.nsf/Files/ethnicdiversity/\\$file/ethnicdiveristy.pdf](http://www.ethnicaffairs.govt.nz/oeawebsite.nsf/Files/ethnicdiversity/$file/ethnicdiveristy.pdf)

## PAPUA NEW GUINEA

According to the main sources, the more than 700 ethnic tribes of Papua New Guinea can be classified into two divisions: Papuans and Melanesians. Both of these were the original inhabitants of the country, having settled there thousands of years ago (EB, CE, ME). Aside from these tribes, Micronesian and Polynesian populations exist that are too small to be counted in this study.

### Estimate:

Papua New Guinea: 100%
